# Supplementary material
Source: PubMed Central journal article supplement (PMC6602869)

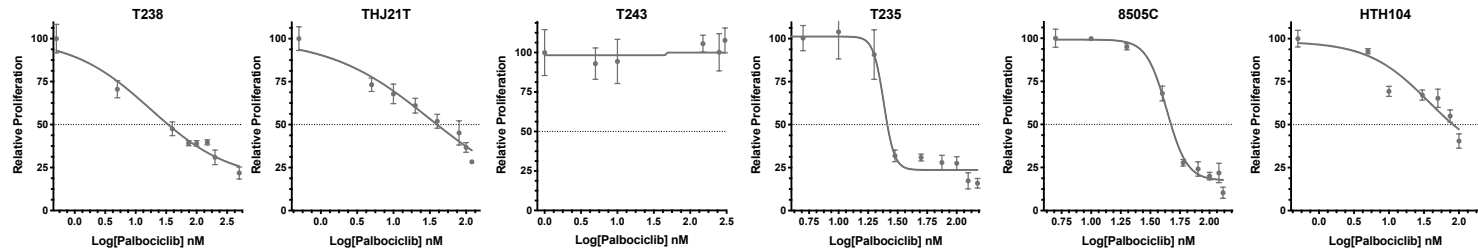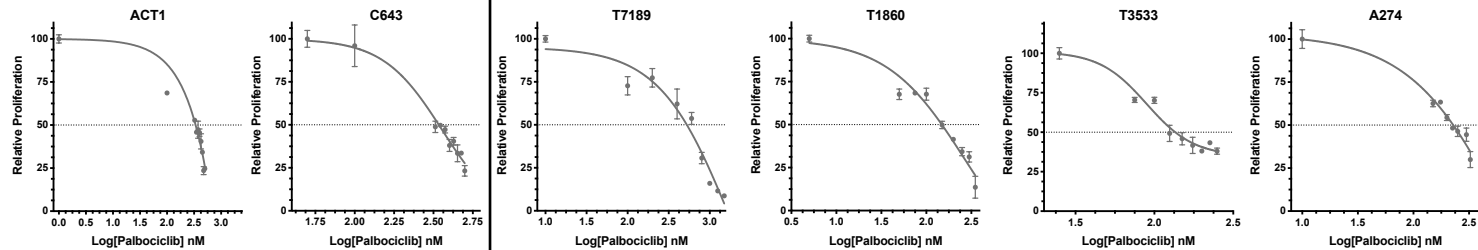

**Mouse cell lines**

Supplement: NIHMS1520851-supplement-01.pdf [file NIHMS1520851-supplement-01.pdf]

**A**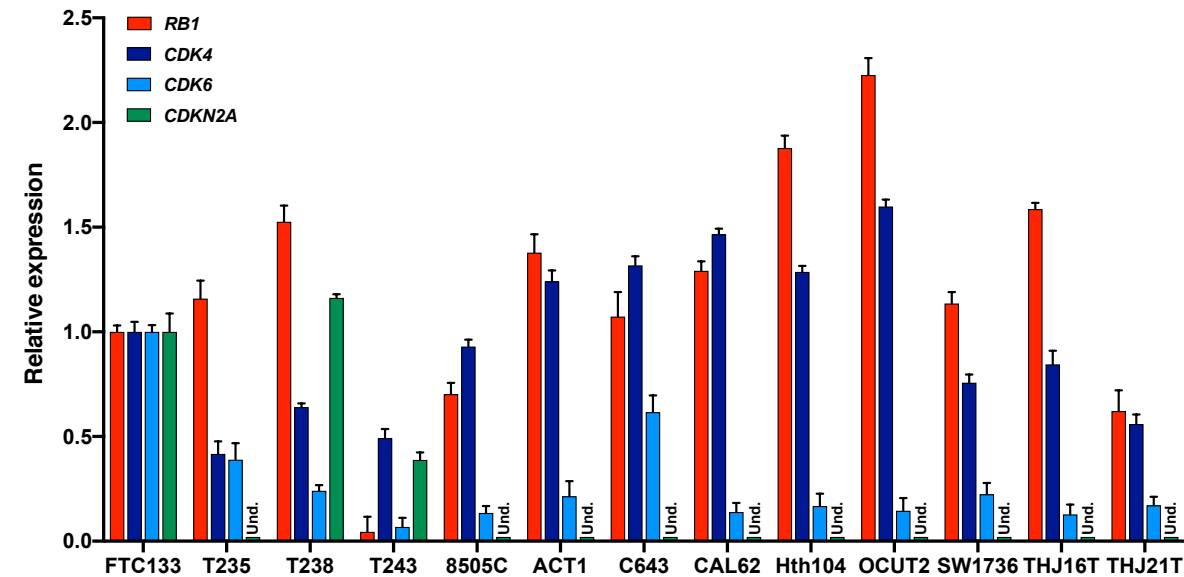**B**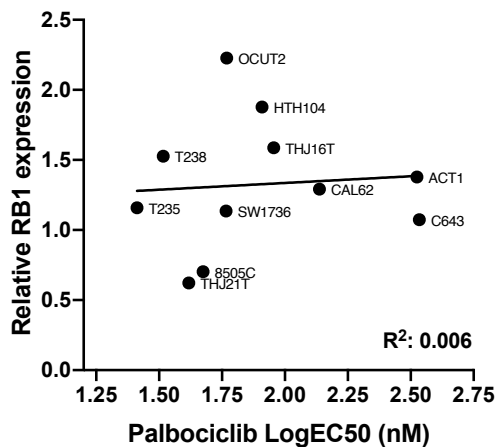**C**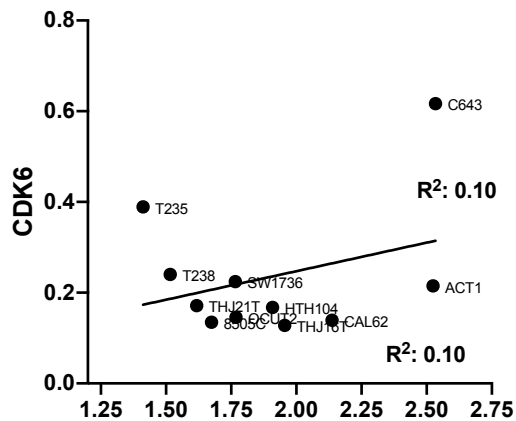

Supplement: NIHMS1520851-supplement-02.pdf [file NIHMS1520851-supplement-02.pdf]

OCUT2

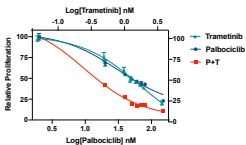

SW1736

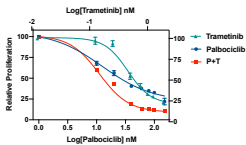

CAL62

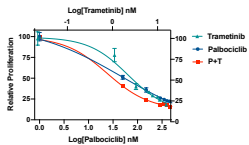

Supplement: NIHMS1520851-supplement-03.pdf [file NIHMS1520851-supplement-03.pdf]

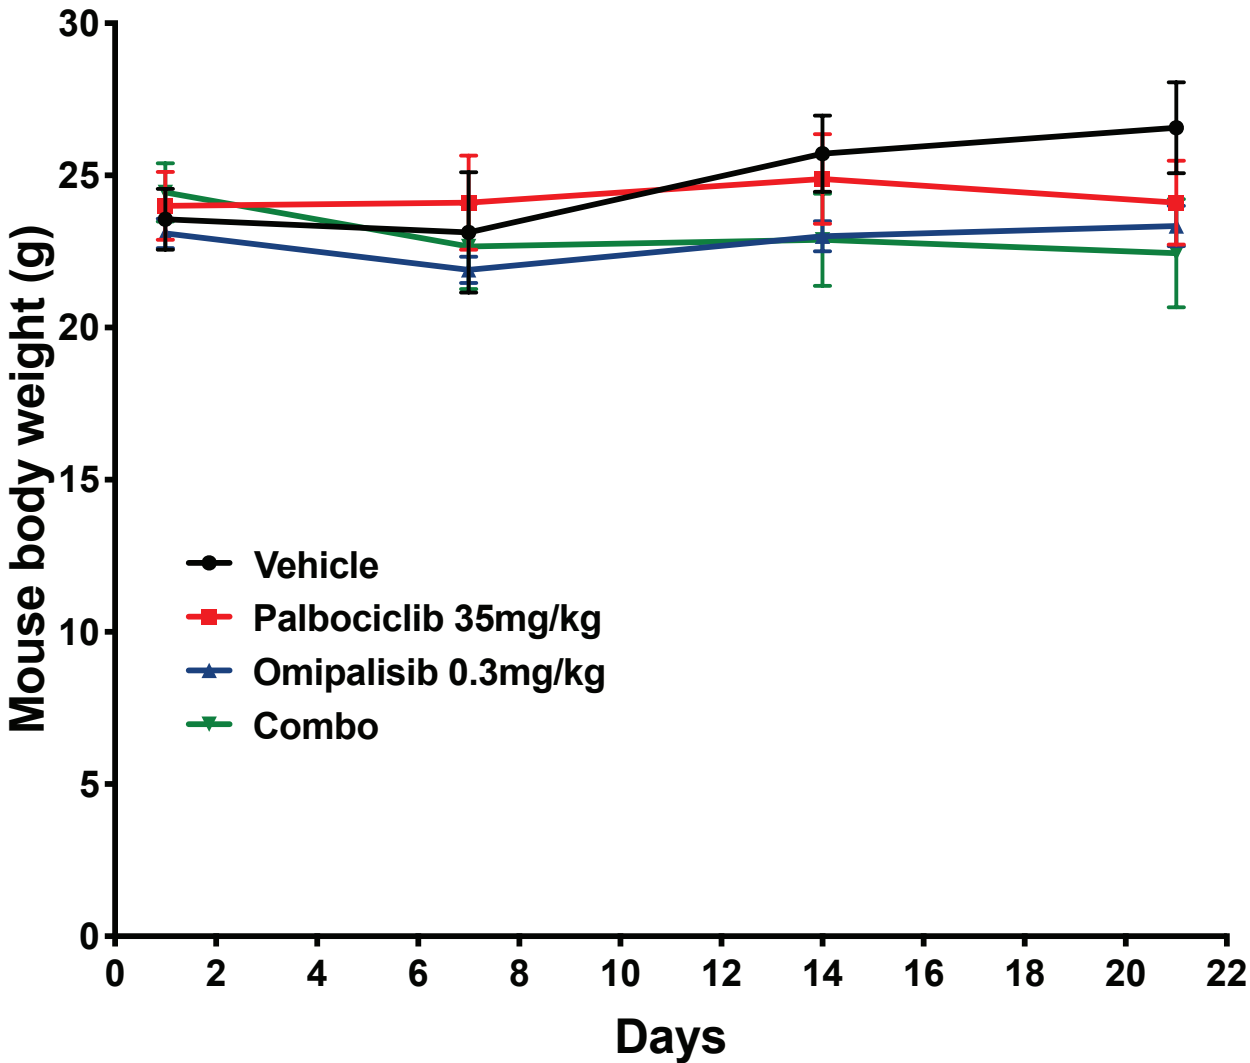

Suppl. Fig. 4

Supplement: NIHMS1520851-supplement-04.pdf [file NIHMS1520851-supplement-04.pdf]
